# Supplementary material
Source: PubMed Central journal article supplement (PMC3993632)
Supplement: JCM.03502-13_zjm999093290so1.pdf [file JCM.03502-13_zjm999093290so1.pdf]

**Table S1. Characteristics of 37 *Escherichia coli* isolates from group B2, subgroup I, and reference strain CFT073**

| Strain name | Alias | Locale            | Host   | Context   | Group B2 | Group B2, sub-group I | CC131 | O16 subset, CC31 | Achtman ST | Pasteur Institute ST | PCR: gyrB47 / mdh36 | PCR: pabB ST131 O25b | PCR: trpA ST131 O16 | PCR O-type | O antigen (serological) | Mouse lethality | fimH allele | fimH allele group | gyrA / parC haplotype | papC | papG II | papG III | sfa/foc | afaD | iha | hra | kpsM | neuC | iron | iutA | ireA | fyuA | irp2 | hlyD | cnf1 | sat | usp | ompT | ibeA | traT | malX | Virulence score |    |    |
|-------------|-------|-------------------|--------|-----------|----------|-----------------------|-------|------------------|------------|----------------------|---------------------|----------------------|---------------------|------------|-------------------------|-----------------|-------------|-------------------|-----------------------|------|---------|----------|---------|------|-----|-----|------|------|------|------|------|------|------|------|------|-----|-----|------|------|------|------|-----------------|----|----|
| C045        | JJ47  | Seattle, WA       | Human  | Clinical  | 1        | 1                     | 1     | 1                | 131        | 506                  | 1                   | 0                    | 1                   | O16        |                         |                 | 41          | 41                | 1A / 1b               | 0    | 0       | 0        | 0       | 0    | 1   | 1   | 0    | 0    | 0    | 1    | 0    | 1    | 1    | 0    | 0    | 1   | 1   | 1    | 0    | 1    | 1    | 9               |    |    |
| C068        | JJ48  | Seattle, WA       | Human  | Clinical  | 1        | 1                     | 1     | 1                | 131        | 506                  | 1                   | 0                    | 1                   | O16        |                         |                 | 41          | 41                | 1A / 1b               | 0    | 0       | 0        | 0       | 1    | 1   | 0   | 1    | 0    | 0    | 1    | 0    | 1    | 1    | 0    | 0    | 1   | 1   | 1    | 0    | 1    | 1    | 10              |    |    |
| C069        | JJ49  | Seattle, WA       | Human  | Clinical  | 1        | 1                     | 1     | 1                | 131        | 506                  | 1                   | 0                    | 1                   | O16        |                         |                 | 41          | 41                | 1A / 1b               | 0    | 0       | 0        | 0       | 1    | 1   | 0   | 1    | 0    | 0    | 1    | 0    | 1    | 1    | 0    | 0    | 1   | 1   | 1    | 1    | 0    | 1    | 1               | 10 |    |
| C099        | JJ50  | Seattle, WA       | Human  | Clinical  | 1        | 1                     | 1     | 1                | 131        | 506                  | 1                   | 0                    | 1                   | O16        |                         |                 | 41          | 41                | 1 / 1b                | 0    | 0       | 0        | 0       | 0    | 1   | 0   | 1    | 0    | 0    | 1    | 0    | 1    | 1    | 0    | 0    | 1   | 1   | 1    | 0    | 1    | 1    | 9               |    |    |
| C100        | JJ51  | Seattle, WA       | Human  | Clinical  | 1        | 1                     | 1     | 1                | 131        | 506                  | 1                   | 0                    | 1                   | O16        |                         |                 | 41          | 41                | 1 / 1b                | 0    | 0       | 0        | 0       | 0    | 1   | 0   | 1    | 0    | 0    | 1    | 0    | 1    | 1    | 0    | 0    | 1   | 1   | 1    | 0    | 1    | 1    | 9               |    |    |
| DP276       | JJ25  | Netherlands       | Human  | Clinical  | 1        | 1                     | 1     | 1                | 131        | 506                  | 1                   | 0                    | 1                   | O16        |                         |                 | 41          | 41                | 1 / 1b                | 0    | 0       | 0        | 0       | 1    | 1   | 0   | 1    | 0    | 0    | 1    | 0    | 1    | 1    | 0    | 0    | 1   | 1   | 1    | 0    | 0    | 1    | 1               | 10 |    |
| G043        | JJ52  | Seattle, WA       | Human  | Clinical  | 1        | 1                     | 1     | 1                | 131        | 506                  | 1                   | 0                    | 1                   | O16        |                         |                 | 41          | 41                | 1A / 1b               | 0    | 0       | 0        | 0       | 0    | 1   | 1   | 0    | 1    | 0    | 0    | 1    | 0    | 1    | 1    | 0    | 0   | 1   | 1    | 1    | 0    | 1    | 1               | 10 |    |
| G068        | JJ53  | Seattle, WA       | Human  | Clinical  | 1        | 1                     | 1     | 1                | 131        | 506                  | 1                   | 0                    | 1                   | O16        |                         |                 | 41          | 41                | 1A / 1b               | 0    | 0       | 0        | 0       | 1    | 1   | 0   | 1    | 0    | 0    | 1    | 0    | 1    | 1    | 0    | 0    | 1   | 1   | 1    | 0    | 1    | 1    | 10              |    |    |
| G130        | JJ54  | Seattle, WA       | Human  | Clinical  | 1        | 1                     | 1     | 1                | 131        | 506                  | 1                   | 0                    | 1                   | O16        |                         |                 | 89          | 41                | 1 / 1b                | 0    | 0       | 0        | 0       | 1    | 1   | 0   | 1    | 0    | 0    | 0    | 0    | 1    | 1    | 0    | 0    | 0   | 1   | 1    | 0    | 1    | 1    | 8               |    |    |
| JJ2029      | JJ07  | Evanston, IL      | Human  | Clinical  | 1        | 1                     | 1     | 1                | 131        | 506                  | 1                   | 0                    | 1                   | O16        | O16                     |                 | 41          | 41                | 1 / 1b                | 0    | 0       | 0        | 0       | 1    | 1   | 0   | 1    | 0    | 0    | 1    | 0    | 1    | 1    | 0    | 0    | 1   | 1   | 1    | 0    | 1    | 1    | 10              |    |    |
| JJ2039      | JJ08  | Evanston, IL      | Human  | Clinical  | 1        | 1                     | 1     | 1                | 131        | 506                  | 1                   | 0                    | 1                   | O16        | O16                     |                 | 41          | 41                | 1B / 1b               | 0    | 0       | 0        | 0       | 0    | 1   | 0   | 1    | 0    | 0    | 1    | 0    | 1    | 1    | 0    | 0    | 1   | 1   | 1    | 0    | 1    | 1    | 9               |    |    |
| JJ2055      | JJ09  | Evanston, IL      | Human  | Clinical  | 1        | 1                     | 1     | 1                | 131        | 506                  | 1                   | 0                    | 1                   | O16        | ONT                     |                 | 41          | 41                | 1 / 1b                | 0    | 0       | 0        | 0       | 1    | 1   | 0   | 1    | 0    | 0    | 1    | 0    | 1    | 1    | 0    | 0    | 1   | 1   | 1    | 0    | 1    | 1    | 10              |    |    |
| JJ2591      | JJ11  | Minneapolis, MN   | Human  | Clinical  | 1        | 1                     | 1     | 1                | 131        | 506                  | 1                   | 0                    | 1                   | O16        |                         | 6/10            | 41          | 41                | 1A / 1b               | 0    | 0       | 0        | 0       | 0    | 1   | 0   | 1    | 0    | 0    | 1    | 0    | 1    | 1    | 0    | 0    | 1   | 1   | 1    | 0    | 1    | 1    | 9               |    |    |
| JJ2663      | JJ10  | Miami, FL         | Human  | Clinical  | 1        | 1                     | 1     | 1                | 131        | 506                  | 1                   | 0                    | 1                   | O16        | O16                     |                 | 41          | 41                | 1A / 1b               | 0    | 0       | 0        | 0       | 0    | 1   | 0   | 1    | 0    | 0    | 1    | 0    | 1    | 1    | 0    | 0    | 1   | 1   | 1    | 0    | 1    | 1    | 9               |    |    |
| MVAST020    | JJ43  | Minneapolis, MN   | Human  | Clinical  | 1        | 1                     | 1     | 1                | 131        | 506                  | 1                   | 0                    | 1                   | O16        |                         |                 | 41          | 41                | 1A / 1b               | 0    | 0       | 0        | 0       | 0    | 1   | 0   | 1    | 0    | 0    | 0    | 1    | 0    | 1    | 1    | 0    | 0   | 1   | 1    | 0    | 1    | 1    | 7               |    |    |
| QU019       | JJ17  | Brisbane, QLD, AU | Human  | Clinical  | 1        | 1                     | 1     | 1                | 131        | 506                  | 1                   | 0                    | 1                   | O16        |                         |                 | 41          | 41                | 1AB / 3A              | 0    | 0       | 0        | 0       | 0    | 1   | 0   | 0    | 0    | 0    | 1    | 0    | 1    | 1    | 0    | 0    | 1   | 1   | 1    | 0    | 1    | 1    | 8               |    |    |
| Q090        | JJ19  | Brisbane, QLD, AU | Human  | Clinical  | 1        | 1                     | 1     | 1                | 131        | 506                  | 1                   | 0                    | 1                   | O16        |                         | 10/10           | 41          | 41                | 1AB / 3A              | 0    | 0       | 0        | 0       | 0    | 1   | 0   | 0    | 0    | 0    | 1    | 0    | 1    | 1    | 0    | 0    | 1   | 1   | 1    | 0    | 1    | 1    | 8               |    |    |
| QUC012      | JJ18  | Brisbane, QLD, AU | Dog    | Clinical  | 1        | 1                     | 1     | 1                | 131        | 506                  | 1                   | 0                    | 1                   | O16        |                         |                 | 41          | 41                | 1A / 1b               | 1    | 1       | 0        | 0       | 1    | 1   | 0   | 1    | 0    | 0    | 1    | 0    | 1    | 1    | 1    | 1    | 1   | 1   | 0    | 1    | 1    | 13   |                 |    |    |
| RM352       | JJ38  | Rochester, MN     | Human  | Clinical  | 1        | 1                     | 1     | 1                | 131        | 506                  | 1                   | 0                    | 1                   | O16        |                         | 10/10           | 234         | 41                | 1 / 1                 | 1    | 0       | 1        | 0       | 0    | 0   | 1   | 1    | 0    | 0    | 1    | 0    | 1    | 1    | 1    | 0    | 1   | 1   | 0    | 1    | 1    | 0    | 1               | 1  | 10 |
| SE15        |       | Japan             | Human  | Commensal | 1        | 1                     | 1     | 1                | 131        | 506                  | 1                   | 0                    | 1                   | O16        |                         | 8/10            | 41          | 41                | 1 / 1                 | 0    | 0       | 0        | 0       | 0    | 0   | 0   | 1    | 0    | 0    | 0    | 0    | 1    | 1    | 0    | 0    | 0   | 1   | 1    | 0    | 1    | 1    | 6               |    |    |
| U054        | JJ55  | Seattle, WA       | Human  | Clinical  | 1        | 1                     | 1     | 1                | 131        | 506                  | 1                   | 0                    | 1                   | O16        |                         |                 | 89          | 41                | 1 / 1b                | 0    | 0       | 0        | 0       | 0    | 1   | 0   | 1    | 0    | 0    | 1    | 0    | 1    | 1    | 0    | 0    | 1   | 1   | 1    | 0    | 1    | 1    | 9               |    |    |
| U084        | JJ56  | Seattle, WA       | Human  | Clinical  | 1        | 1                     | 1     | 1                | 131        | 506                  | 1                   | 0                    | 1                   | O16        |                         |                 | 41          | 41                | 1A / 1b               | 0    | 0       | 0        | 0       | 1    | 1   | 0   | 1    | 0    | 0    | 1    | 0    | 1    | 1    | 0    | 0    | 1   | 1   | 1    | 0    | 1    | 1    | 10              |    |    |
| U149        | JJ58  | Seattle, WA       | Human  | Clinical  | 1        | 1                     | 1     | 1                | 131        | 506                  | 1                   | 0                    | 1                   | O16        |                         |                 | 41          | 41                | 1A / 1b               | 0    | 0       | 0        | 0       | 0    | 1   | 0   | 1    | 0    | 0    | 0    | 1    | 1    | 0    | 0    | 0    | 1   | 1   | 0    | 1    | 1    | 7    |                 |    |    |
| U193        | JJ59  | Seattle, WA       | Human  | Clinical  | 1        | 1                     | 1     | 1                | 131        | 506                  | 1                   | 0                    | 1                   | O16        |                         | 6/10            | 41          | 41                | 1A / 1b               | 0    | 0       | 0        | 0       | 1    | 1   | 0   | 1    | 0    | 0    | 1    | 0    | 1    | 1    | 0    | 0    | 1   | 1   | 1    | 0    | 1    | 1    | 10              |    |    |
| USVAST364   | JJ30  | Dallas, TX        | Human  | Clinical  | 1        | 1                     | 1     | 1                | 131        | 506                  | 1                   | 0                    | 1                   | O16        |                         | 10/10*          | 41          | 41                | 1AB / 3A              | 0    | 0       | 0        | 0       | 0    | 1   | 0   | 0    | 0    | 0    | 0    | 1    | 1    | 0    | 0    | 0    | 1   | 1   | 0    | 1    | 1    | 6    |                 |    |    |
| JJ2449      | JJ14  | NY, NY            | Human  | Clinical  | 1        | 1                     | 1     | 0                | 10112      | 43                   | 1                   | 1                    | 0                   | ONT        | ONT                     |                 | 30          | 30                | 1AB / 1aAB            | 0    | 0       | 0        | 0       | 0    | 1   | 0   | 1    | 0    | 0    | 1    | 0    | 1    | 1    | 0    | 0    | 1   | 1   | 1    | 0    | 1    | 1    | 9               |    |    |
| QU-221      | JJ20  | Brisbane, QLD, AU | Human  | Clinical  | 1        | 1                     | 1     | 0                | 131        | 43                   | 1                   | 1                    | 0                   | ONT        | ONT                     |                 | 30          | 30                | 1AB / 1aAB            | 0    | 0       | 0        | 0       | 0    | 1   | 0   | 1    | 0    | 0    | 1    | 0    | 1    | 1    | 0    | 0    | 1   | 1   | 1    | 0    | 1    | 1    | 9               |    |    |
| DAEC18      |       | Brazil            | Human  | Diarrhea  | 1        | 1                     | 1     | 0                | 131        | 43                   | ND                  | 1                    | 0                   | O25b       |                         |                 | 22          | 22                | 1 / 1                 | 0    | 0       | 0        | 0       | 1    | 1   | 0   | 1    | 0    | 0    | 1    | 0    | 1    | 1    | 0    | 0    | 1   | 1   | 1    | 1    | 1    | 1    | 11              |    |    |
| NA114       |       | India             | Human  | Clinical  | 1        | 1                     | 1     | 0                | 131        | 43                   | ND                  | 1                    | 0                   | O25b       |                         |                 | 30          | 30                | 1AB / 1aAB            | 1    | 1       | 0        | 0       | 0    | 1   | 0   | 1    | 0    | 0    | 1    | 1    | 1    | 0    | 0    | 1    | 1   | 1   | 0    | 0    | 1    | 1    | 11              |    |    |
| TU          |       | Tunisia           | Human  | Clinical  | 1        | 1                     | 1     | 0                | 131        | 43                   | ND                  | 1                    | 0                   | O25b       |                         |                 | 30          | 30                | 1AB / 1aAB            | 0    | 0       | 0        | 0       | 0    | 1   | 0   | 1    | 0    | 0    | 1    | 1    | 1    | 0    | 0    | 1    | 1   | 1   | 0    | 1    | 1    | 9    |                 |    |    |
| EC7372      |       | USA               | Human  | Clinical  | 1        | 1                     | 1     | 0                | 131        | 162                  | ND                  | 1                    | 0                   | O25b       | O25                     | 10/10           | 298         | 22                | 1 / 1                 | 1    | 1       | 0        | 0       | 1    | 1   | 0   | 1    | 0    | 0    | 1    | 0    | 1    | 1    | 1    | 0    | 1   | 1   | 1    | 0    | 1    | 1    | 12              |    |    |
| DAEC11      |       | Brazil            | Human  | Diarrhea  | 1        | 1                     | 1     | 0                | 131        | 233                  | ND                  | 1                    | 0                   | O25b       |                         | 10/10           | 22          | 22                | 1 / 1                 | 0    | 0       | 0        | 0       | 1    | 1   | 0   | 1    | 0    | 0    | 1    | 0    | 1    | 1    | 0    | 0    | 1   | 1   | 1    | 1    | 1    | 1    | 11              |    |    |
| TN03        |       | France            | Human  | Clinical  | 1        | 1                     | 1     | 0                | 131        | 267                  | ND                  | 1                    | 0                   | O25b       | O25                     | 10/10           | 30          | 30                | 1AB / 1aAB            | 0    | 0       | 0        | 0       | 0    | 1   | 0   | 1    | 0    | 0    | 1    | 0    | 1    | 1    | 0    | 0    | 1   | 1   | 1    | 0    | 1    | 1    | 9               |    |    |
| ECOR66      |       | USA               | Mammal | Commensal | 1        | 1                     | 0     | 0                | 83         | 207                  | 0                   | 0                    | 0                   | O4         |                         | 10/10           | 21          | 21                | 51 / 62               | 1    | 0       | 1        | 1       | 0    | 0   | 1   | 1    | 1    | 1    | 0    | 0    | 1    | 1    | 0    | 0    | 0   | 1   | 1    | 0    | 1    | 1    | 10              |    |    |
| LBC24a      |       | France            | Human  | Commensal | 1        | 1                     | 0     | 0                | 538        | 221                  | ND                  | 0                    | 1                   | ONT        | O43                     | 10/10           | 20          | 20                | 31 / 41a              | 0    | 0       | 0        | 0       | 0    | 0   | 1   | 0    | 0    | 0    | 0    | 1    | 1    | 0    | 0    | 0    | 1   | 1   | 0    | 0    | 1    | 6    |                 |    |    |
| M1139       |       | Australia         | Mammal | Commensal | 1        | 1                     | 0     | 0                | 3623       | 308                  | ND                  | 0                    | 0                   | O16        |                         |                 | 5           | 5                 | 51 / 41a              | 0    | 0       | 0        | 0       | 0    | 0   | 1   | 1    | 0    | 0    | 0    | 1    | 1    | 0    | 0    | 0    | 1   | 1   | 0    | 1    | 1    | 6    |                 |    |    |
| CFT073      |       | Baltimore, MD     | Human  | Clinical  | 1        | 0                     | 0     | 0                | 73         | 4                    | 0                   | 0                    | 0                   | O6         |                         |                 | 10          | 9                 | 7/25b                 | 1    | 1       | 0        | 1       | 0    | 1   | 0   | 1    | 0    | 1    | 1    | 1    | 1    | 1    | 0    | 1    | 1   | 1   | 0    | 0    | 1    | 14   |                 |    |    |

\*Strain USVAST364 exhibited exceptionally rapid mouse lethality.
